# Supplementary material
Source: MDPI journal article supplement (https://www.mdpi.com/2673-6284/9/4/21)

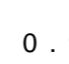

Supplement: s1 [file s1]
